# Supplementary material for: The renal cancer risk allele at 14q24.2 activates a novel hypoxia-inducible transcription factor-binding enhancer of DPF3 expression
Source: PubMed Central journal article supplement — J Biol Chem. 2022 Feb 8;298(3):101699. doi: 10.1016/j.jbc.2022.101699 (PMC8897700; doi:10.1016/j.jbc.2022.101699), 2022-02-08

# The renal cancer risk allele at 14q24.2 activates a novel hypoxia-inducible transcription factor-binding enhancer of DPF3 expression

Johanna Protze<sup>1</sup>, Stephanie Naas<sup>1</sup>, René Krüger<sup>1</sup>, Christine Stöhr<sup>2</sup>, Andre Kraus<sup>1</sup>, Steffen Grampp<sup>1</sup>, Michael Wiesener<sup>1</sup>, Mario Schiffer<sup>1</sup>, Arndt Hartmann<sup>2,3</sup>, Bernd Wullich<sup>3,4</sup>, Johannes Schödel<sup>1</sup>

1. Department of Nephrology and Hypertension, Universitätsklinikum Erlangen und Friedrich-Alexander- Universität Erlangen-Nürnberg, Ulmenweg 18, 91054 Erlangen, Germany.
2. Institute of Pathology, Universitätsklinikum Erlangen und Friedrich-Alexander- Universität Erlangen-Nürnberg, Krankenhausstraße 8-10, 91054 Erlangen, Germany.
3. Comprehensive Cancer Center Erlangen-EMN (CCC ER-EMN), Erlangen, Germany.
4. Department of Urology and Pediatric Urology, Universitätsklinikum Erlangen und Friedrich-Alexander- Universität Erlangen-Nürnberg, Krankenhausstraße 12, 91054 Erlangen, Germany.

## Supplemental Information

## Supplemental table and figure legends

### Supplemental table 1

SNPs in high LD with rs4903064.

### Supplemental table 2

Oligonucleotides used in this study.

### Supplemental figure 1

DPF3 mRNA expression (TPM) in the TCGA normal tissue (green) and cancer (red) data sets. The box indicates kidney tumors. ccRCC tumors are highlighted in yellow (KIRC). Bars are mean values and numbers of samples per analysis are indicated below the graph. Data is derived from the GEPIA TCGA analysis tool (<http://gepia.cancer-pku.cn>).

### Supplemental figure 2

A) Distribution of C and T alleles of rs4903064 in the 1000Genome project EUR cohort (blue), the CCC Erlangen-EMN ccRCC cohort (red) and non-ccRCC renal cancer patients from that cohort (grey). B) Relative expression levels of GLUT3 in the CCC Erlangen-EMN ccRCC cohort stratified according to the rs4903064 genotype. C) DPF3 expression in the cohort of patients with a non-ccRCC renal cancer according to the rs4903064 genotype. Bars indicate mean  $\pm$ SD.

### Supplemental figure 3

A) Luciferase Reporter assay performed in MCF-7 cells. Cells were transfected with plasmids and treated with 1mM DMOG or left untreated as described in main figure 2G. T test, \*\*\*,  $p < 0.001$ . B) MCF-7 cells were depleted for the indicated HIF- $\alpha$  isoforms using siRNA and transfected with the reporter plasmid including the risk allele. Cells were exposed to 1mM DMOG for 16h. Reporter activity was normalized to the activity of co-transfected  $\beta$ -galactosidase. Bars indicate mean values of one experiment performed in duplicates. C) Western blot for HIF-1 $\alpha$  and HIF-2 $\alpha$  from lysates of MCF-7 cells treated with the indicated siRNA and exposed to 1mM of DMOG or left untreated. Cells were cultured in parallel to cells used for the reporter assay shown in B. Arrow indicates the HIF-2 $\alpha$  band. D) Western blot for HIF-1 $\alpha$  and HIF-2 $\alpha$  from lysates of Hela cells treated with the indicated siRNA and exposed to 1mM of DMOG or left untreated. Cells were cultured in parallel to cells used for the reporter assay shown in main figure 2 H.

#### Supplemental figure 4

HIF-ChIP at the *DPF3* enhancer locus in two primary cell cultures of ccRCC cells isolated from individuals with the rs4903064 TT genotype or the CT genotype. Results are from one experiment and representative for three experiments per genotype.

#### Supplemental figure 5

A) Using available RNA-seq data from primary renal tubular cells (PTC) (Naas S., manuscript in preparation) genes within 500kb upstream or downstream of the *DPF3* TSS were tested for expression (base mean >100) and regulation by the HIF-stabilizer DMOG. Of the expressed genes, three genes (*ZFYVE1*, *PSEN1* and *NUMB*) were significantly induced by DMOG treatment ( $p < 0.05$ ). Independent HIF-binding signals could be detected at the *ZFYVE1* and the *NUMB* locus indicating that expression of these genes is regulated by separate regulatory elements. B) Expression of *PSEN1* was examined in isolated primary tubular cells exposed to 1mM DMOG for 16h or left untreated (control) by qPCR. The weak induction observed in RNA-seq experiments could not be reproduced in independent samples by qPCR. In addition, stratifying expression of *PSEN1* under DMOG conditions according to the rs4903064 genotype revealed no genotype-specific effects.

#### Supplemental figure 6

A) FAIRE-seq tracks at the *DPF3* enhancer including the SNP rs4903064 (highlighted in yellow). The top three tracks (red) are FAIRE-seq tracks from primary renal tubular cells published in Grampp et al. 2017. The other tracks were generated by the ENCODE consortium. Data is in hg19. B) Relative *DPF3* mRNA expression in different cell lines exposed to 1mM DMOG for 16h compared to untreated controls. The genotype of the cells for rs4903064 is indicated above the values. Data is from 1-3 experiments per cell line. Values are mean and error bars indicate standard deviation as applicable.

#### Supplemental figure 7

TCGA copy number variation data in the KIRC ccRCC cohort. Samples were stratified according to alterations at the *HIF1A* locus (x-axis) and numbers of mutations of *DPF3* are shown in different colours. Data is from <https://www.cbioportal.org/>.

#### Supplemental figure 8

Relative expression values of *DPF3* in primary renal tubular cells. Values were stratified according to the rs4903064 genotype and the gender of the donors indicated with symbols.

Supplemental figure 9

A) Relative expression values of DPF3 in isolated tumor cells carrying the risk allele C compared to corresponding primary tubular cells and stratified according to the PBRM1 mutation status (as defined in B). T test: not significant (ns). B) Western blots for PBRM1 using lysates of isolated renal tumor cells. Only tumor cells carrying a risk allele were used for analysis in A. N: normal, T: tumor.

### Supplemental table 1

| QRSID     | RSID       | RSALIAS    | CHR | POS1     | POS2     | DIST  | R2       | D        | DPRIME   | MAJOR | MINOR | MAF      |
|-----------|------------|------------|-----|----------|----------|-------|----------|----------|----------|-------|-------|----------|
| rs4903064 | rs11620775 | rs60339375 | 14  | 72812462 | 72808736 | -3975 | 0.852665 | 0.167232 | 0.943894 | C     | T     | 0.233598 |
| rs4903064 | rs12050132 | NA         | 14  | 72812462 | 72809542 | -3170 | 0.946882 | 0.179261 | 0.983637 | A     | T     | 0.245527 |
| rs4903064 | rs4903064  | NA         | 14  | 72812462 | 72812462 | 0     | 1        | 1        | 1        | T     | C     | 0.241551 |
| rs4903064 | rs7152005  | rs61351179 | 14  | 72812462 | 72813710 | 998   | 0.801788 | 0.160207 | 0.936109 | C     | T     | 0.225646 |
| rs4903064 | rs28840762 | rs58119506 | 14  | 72812462 | 72819416 | 6704  | 0.852665 | 0.167232 | 0.943894 | T     | C     | 0.233598 |
| rs4903064 | rs2332920  | rs59774530 | 14  | 72812462 | 72819750 | 7038  | 0.852665 | 0.167232 | 0.943894 | A     | G     | 0.233598 |
| rs4903064 | rs8015900  | rs56991741 | 14  | 72812462 | 72821222 | 8510  | 0.821913 | 0.162709 | 0.942424 | T     | A     | 0.227634 |
| rs4903064 | rs2109794  | rs61636270 | 14  | 72812462 | 72822147 | 9435  | 0.824029 | 0.166305 | 0.907761 | G     | A     | 0.241551 |

**Supplemental table 2**

|                                    |                                |
|------------------------------------|--------------------------------|
| <b>CRISPR/Cas9 guides</b>          |                                |
| DPF3 exon2 guide1 fw               | CACCGACAGCCGTGAGTTGTAACTC      |
| DPF3 exon2 guide1 rev              | AAACGAGTTACAACCTCACGGCTGTC     |
| DPF3 exon2 guide2 fw               | CACCGCTCGGGGACCAGTTCTACA       |
| DPF3 exon2 guide2 rev              | AAACTGTAGAACTGGTCCCCGAGC       |
| <b>PAGE primers</b>                |                                |
| DPF3 CRISP ex2 Cloning KPNI fw     | GCATGGTACCCTCGGTGCCTCTTCTCCATC |
| DPF3 CRISP ex2 Cloning NHEI rev    | GCTAGCTAGCTCATTGGCAAGGCTCTTGGT |
| <b>ICE primers</b>                 |                                |
| ICE DPF3 Primer fw                 | AATGCCCCACACCATCCTTG           |
| ICE DPF3 Primer rev                | TGGGACCTCATGCTTCCTAGA          |
| <b>ICE sequencing</b>              |                                |
| ICE sequencing                     | TATCTCAGAGGCCCATGTGC           |
| <b>Expression primer</b>           |                                |
| HPRT fw                            | GACCAGTCAACAGGGGACAT           |
| HPRT rev                           | CTGAGCCTTCCTCAGCGATT           |
| CA9 fw                             | GAGGCCTGGCCGTGTTG              |
| CA9 rev                            | CTGAGCCTTCCTCAGCGATT           |
| DPF3 fw                            | AGCGTGCCTTCCCTT                |
| DPF3 rev                           | GCTCCACTTCAGGTTTTATCTCC        |
| EGLN3 fw                           | GGCCATCAGCTTCCTCCTG            |
| EGLN3 rev                          | GGTGATGCAGCGACCATCA            |
| DPF3 ex3_4 fw                      | CGGCTGCTGGAGATAAAACC           |
| DPF3 ex3_4 rev                     | TCCACCTTCTTCTCAACCCC           |
| PSEN1 fw                           | TATCAAGTACCTCCCTGAAT           |
| PSEN1 rev                          | ACCATTGTTGAGGAGTAAAT           |
| <b>ChIP</b>                        |                                |
| DPF3 hif bind(14q24.2 HIF ChIP fw) | TGGAGGCTTTGTAGCTAGG            |
| 14q24.2 HIF ChIP rev               | CACACTGCTCTGTGTCAGCA           |
| EGLN3 hif bind fw                  | AGTGTCCGTTCCCAGCTCAG           |
| EGLN3 hif bind rev                 | TAGGCACAGTAAACAGGCC            |
| CCND1 neg3 fw                      | GGATCACCAGGTGTATTCCG           |
| CCND1 neg3 rev                     | CATCCAAGGGGGATACACAC           |
| <b>Reporter cloning</b>            |                                |
| 14q24.2 reportert fw KPNI          | GCATGGTACCAGGAGGCAGGGTTGGTATTT |
| 14q24.2 reportert REV NHEI         | GCTAGCTAGCTTCCCCTCTTTTGTGGTC   |

Supplemental figure 1

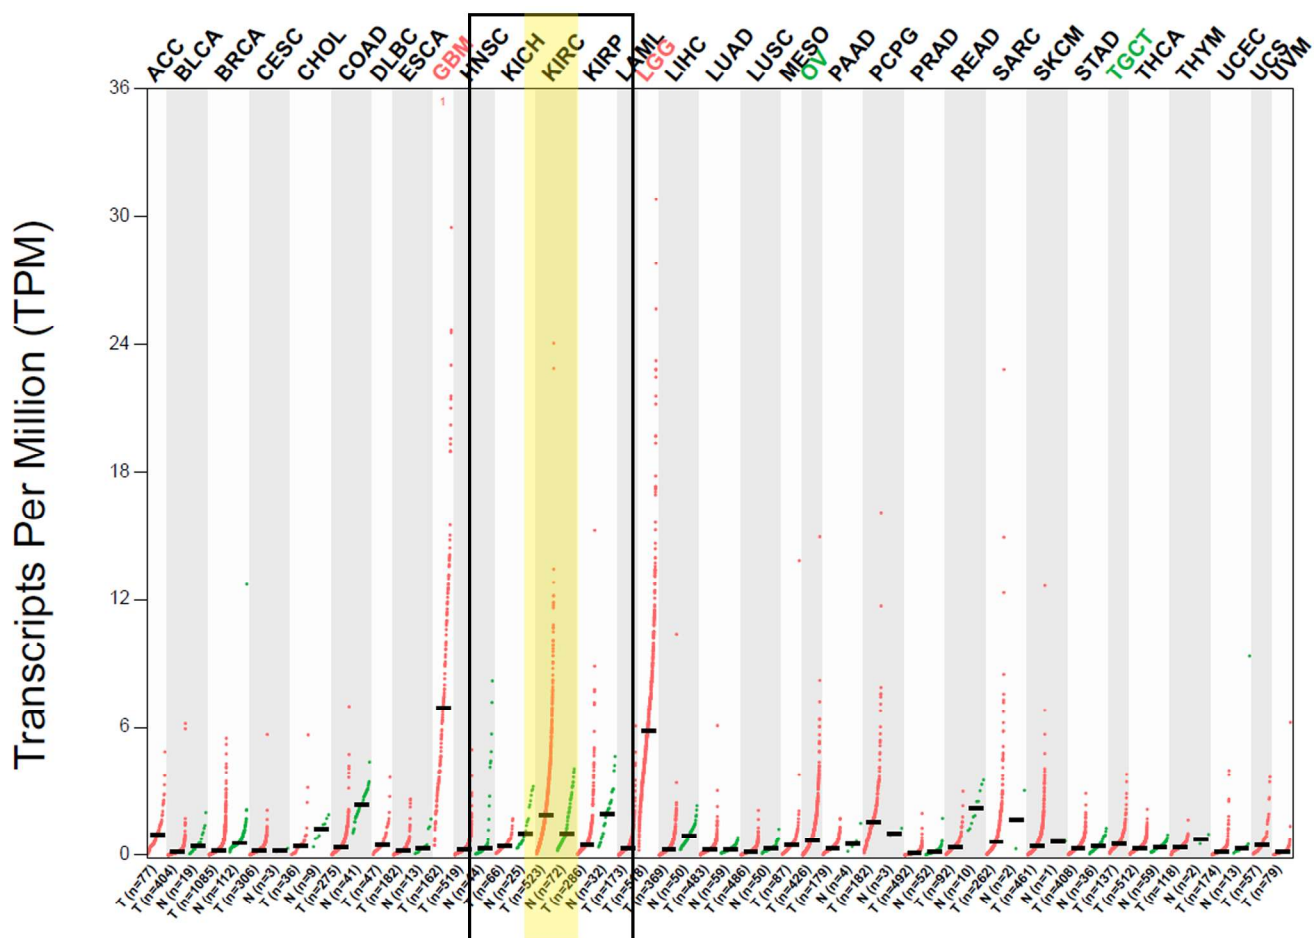

Supplemental figure 2

A

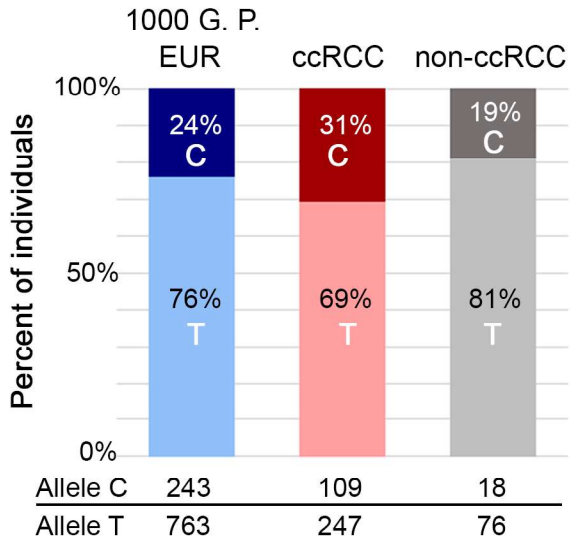

B

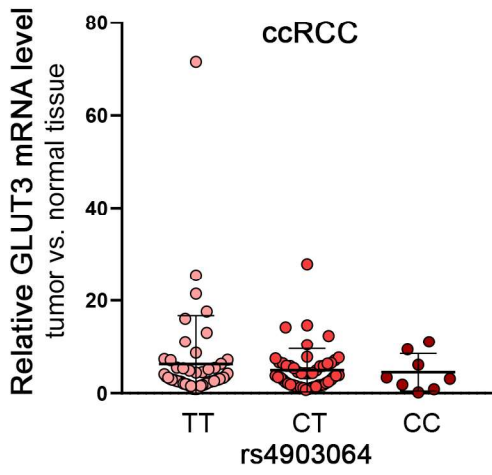

C

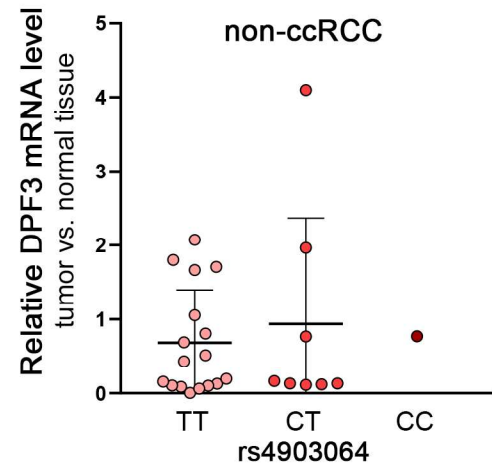



Supplemental figure 3

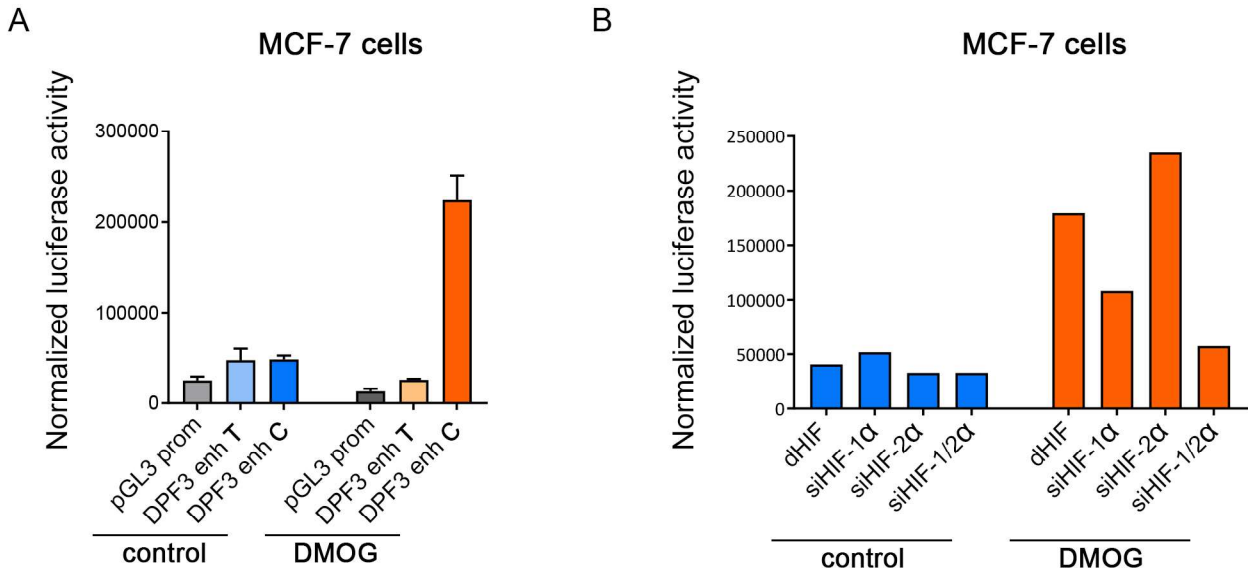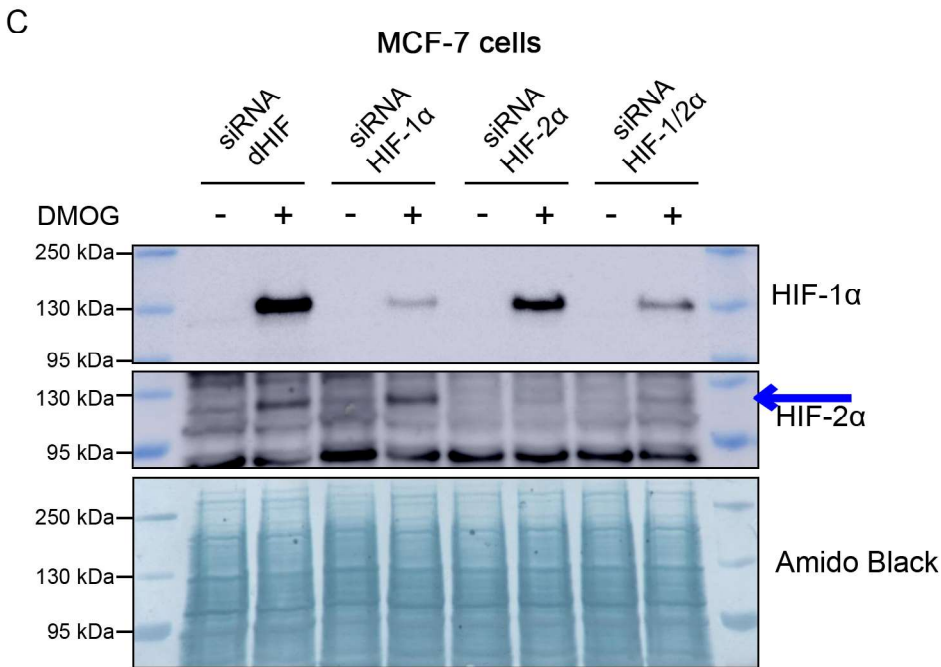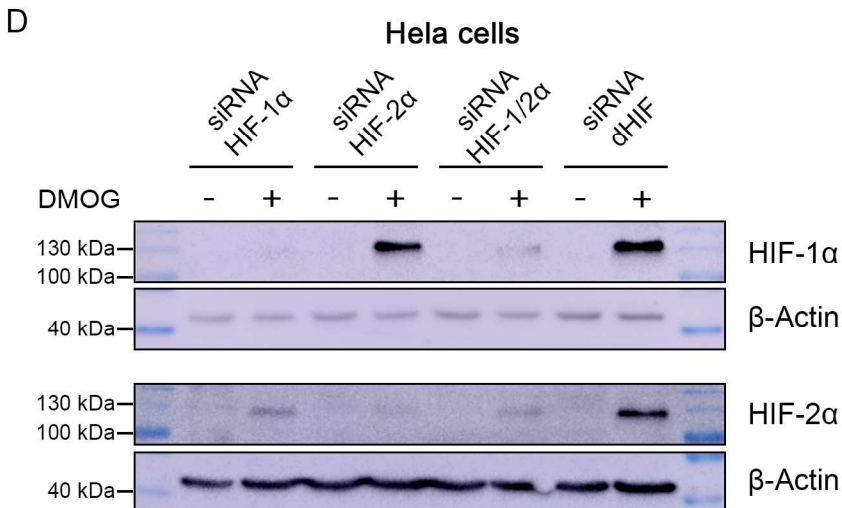

Supplemental figure 4

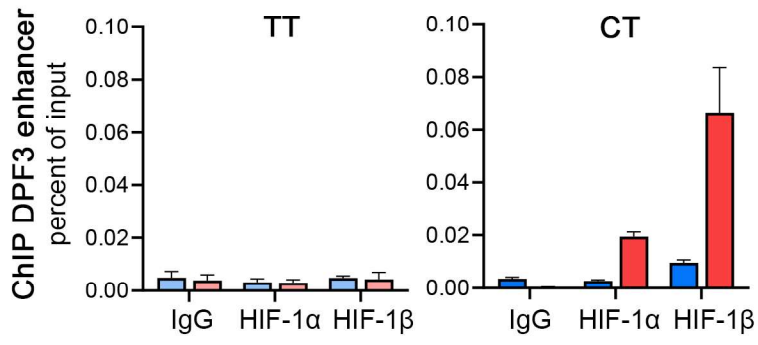

Supplemental figure 5

A

| Gene          | expressed in PTC | log2 fold RNA-seq | HIF-binding site |
|---------------|------------------|-------------------|------------------|
| RGS6          |                  |                   |                  |
| DCAF4         |                  |                   |                  |
| AC007160.1    |                  |                   |                  |
| AL442663.4    |                  |                   |                  |
| <b>ZFYVE1</b> |                  | 0.85434297        | yes              |
| AL442663.3    |                  |                   |                  |
| RBM25         |                  |                   |                  |
| <b>PSEN1</b>  |                  | 0.35416872        |                  |
| PAPLN         |                  |                   |                  |
| AC004846.1    |                  |                   |                  |
| AC004846.2    |                  |                   |                  |
| <b>NUMB</b>   |                  | 0.34846081        | yes              |

B

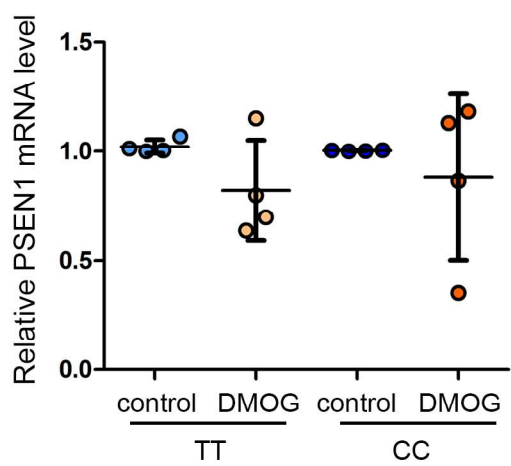

Supplemental figure 6

A

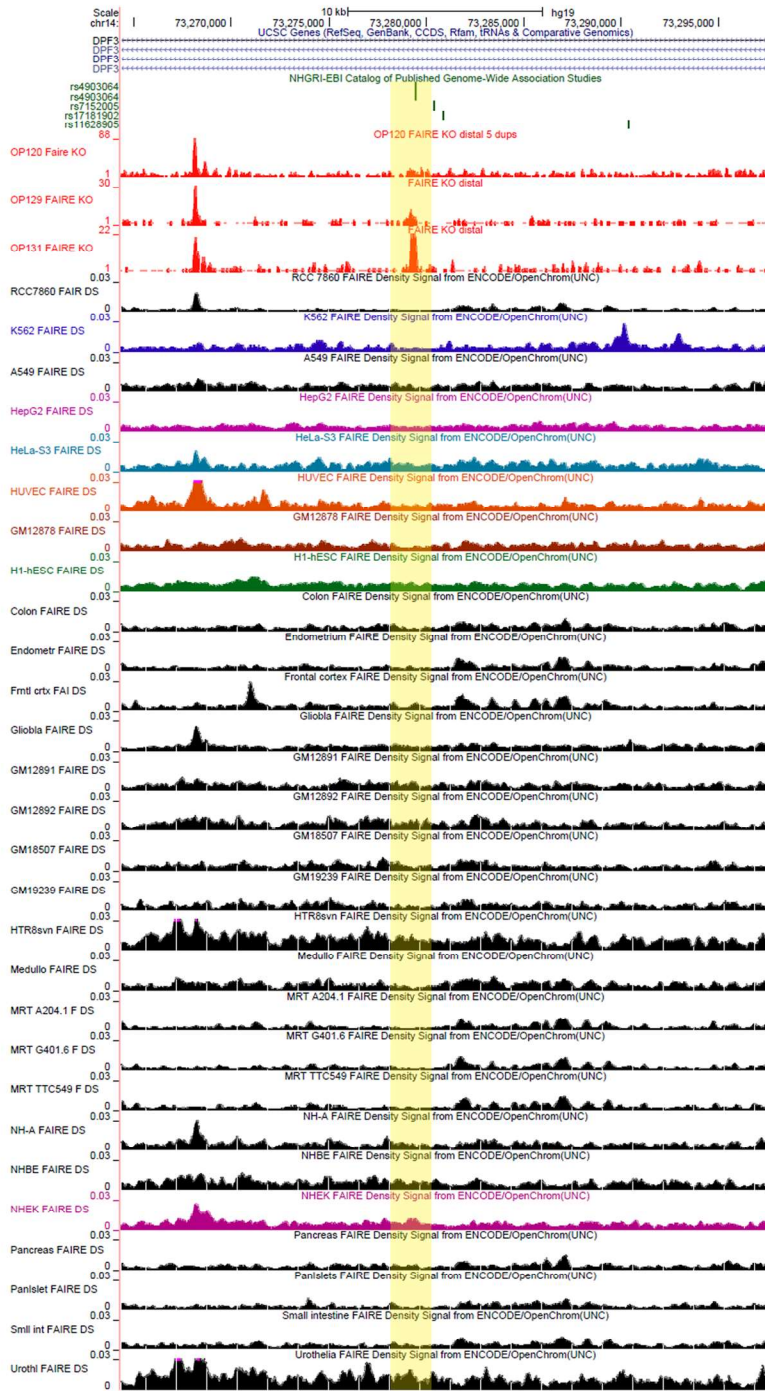

B

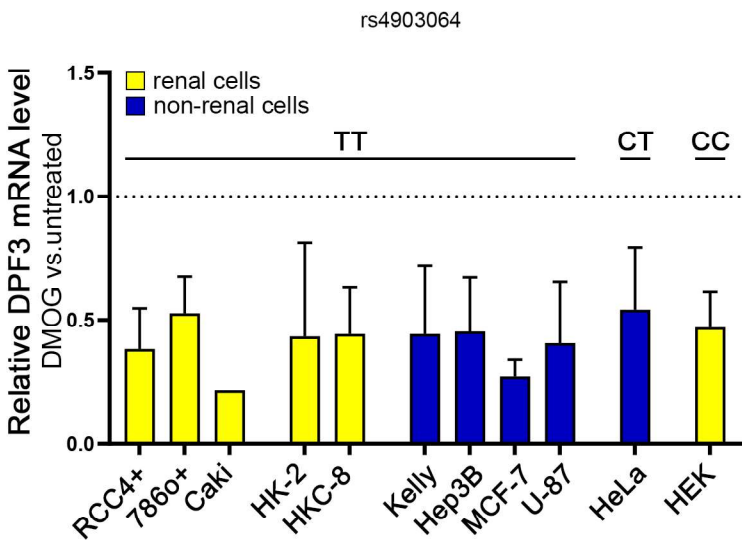

Supplemental figure 7

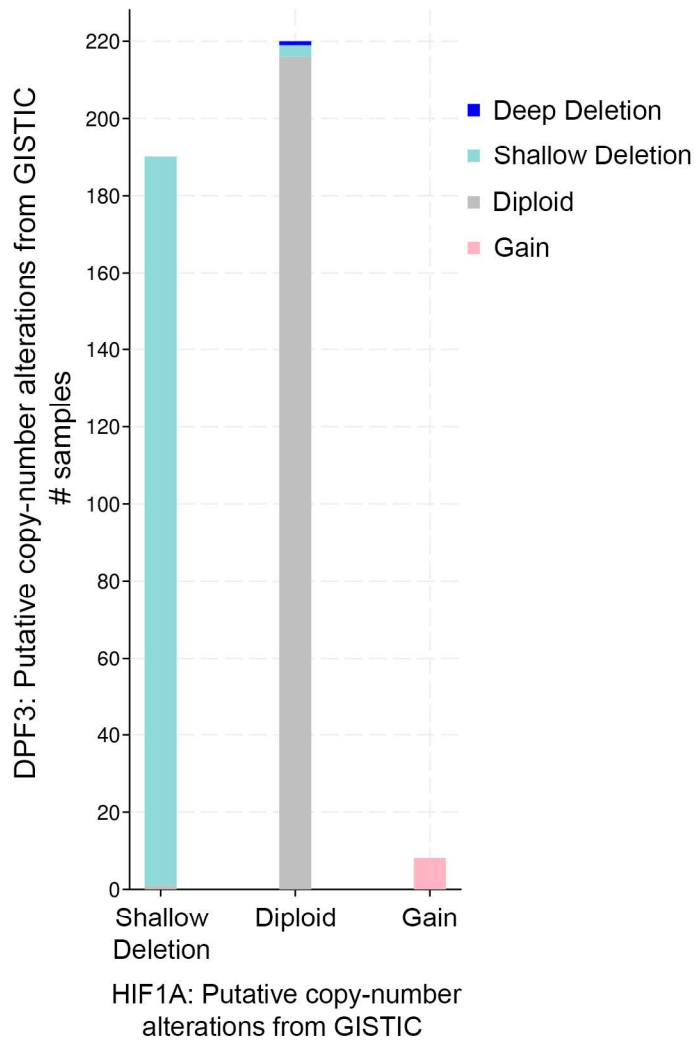

Supplemental figure 8

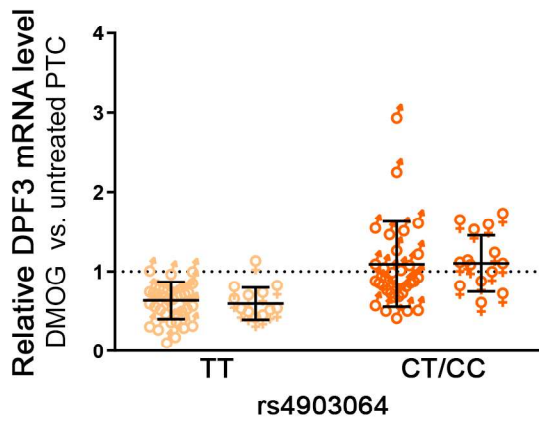

Supplemental figure 9

A

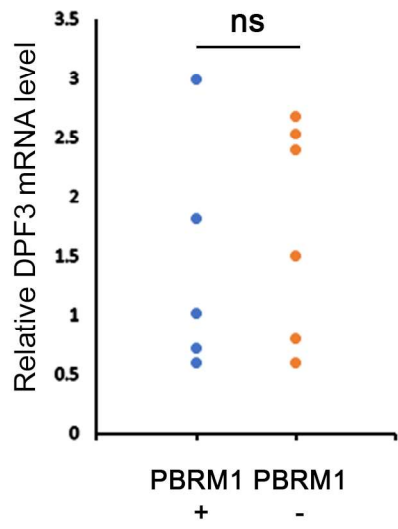

B

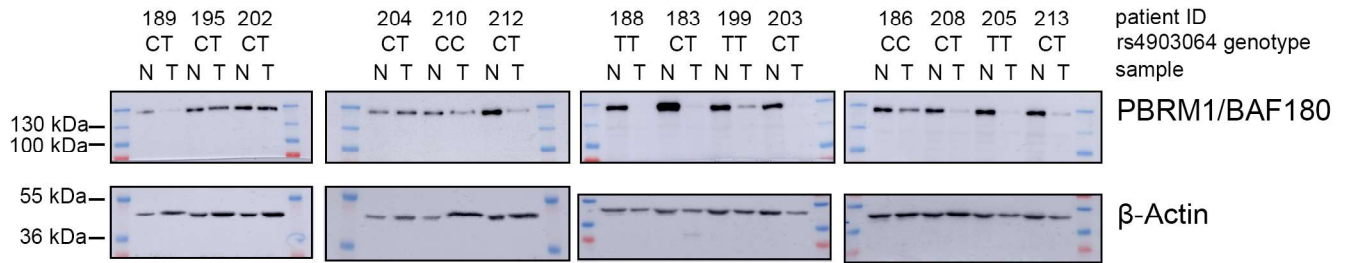

Supplement: mmc1.pdf [file mmc1.pdf]
